# Supplementary material
Source: PubMed Central journal article supplement (PMC2879644)
Supplement: NIHMS194311-supplement-01.pdf [file NIHMS194311-supplement-01.pdf]

Molecular Cell, *Volume 38*

**Supplemental Information**

**SUMO-Specific Protease 2 Is Essential for Suppression of  
Polycomb Group Protein-Mediated Gene Silencing during  
Embryonic Development**

Xunlei Kang, Yitao Qi, Yong Zuo, Qi Wang, Yanqiong Zou,  
Robert J. Schwartz, Jinke Cheng, and Edward T.H. Yeh

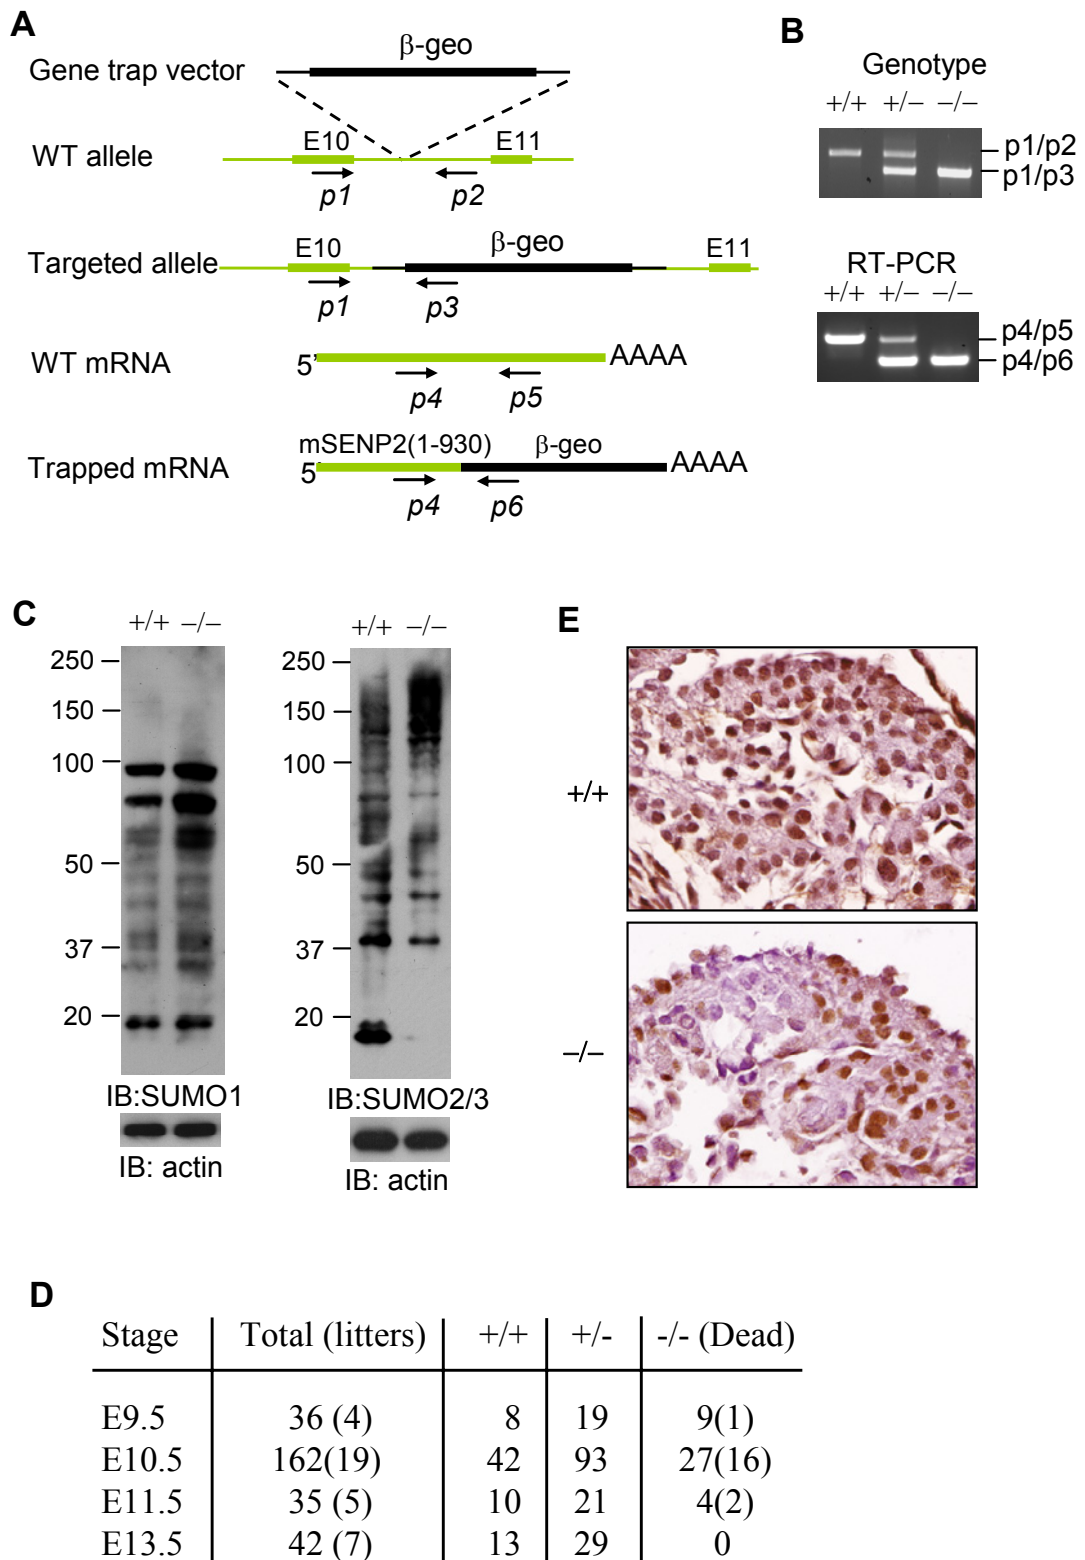

**Figure S1. Generation and analysis of mice with targeted mutation of *SENP2* gene.**

**A**, Structures of *SENP2* genomic DNA, the gene trap vector, the targeted allele, *SENP2* WT mRNA, and trapped *SENP2* mRNA. Locations of the PCR primers used for genotyping and RT-PCR are indicated. **B**, PCR analysis of genomic DNA obtained from

live progeny of *SENP2*<sup>+/-</sup> intercrosses and RT-PCR of total RNA from embryos. **C**, Western blot analysis of embryo extracts with anti-SUMO-1 or anti-SUMO-2/3 antibodies. **D**. Numbers of the observed live and dead (in parentheses) *SENP2*<sup>-/-</sup> embryos to the total number of embryos analyzed at different stages of development. **E**. Immunostaining with anti-PCNA in heart sections from *SENP2*<sup>+/+</sup> and *SENP2*<sup>-/-</sup> embryos at E10.5 revealed reduced proliferation in the *SENP2*<sup>-/-</sup> embryos.

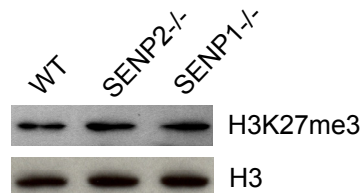

**Figure S2. Mutation of SENP2 does not alter H3K27 methylation pattern.** The lysates from *SENP2*<sup>+/+</sup> (WT), *SENP2*<sup>-/-</sup>, and *SENP1*<sup>-/-</sup> MEF cells were analyzed by immunoblotting with anti-H3K27me3 or H3 antibodies.

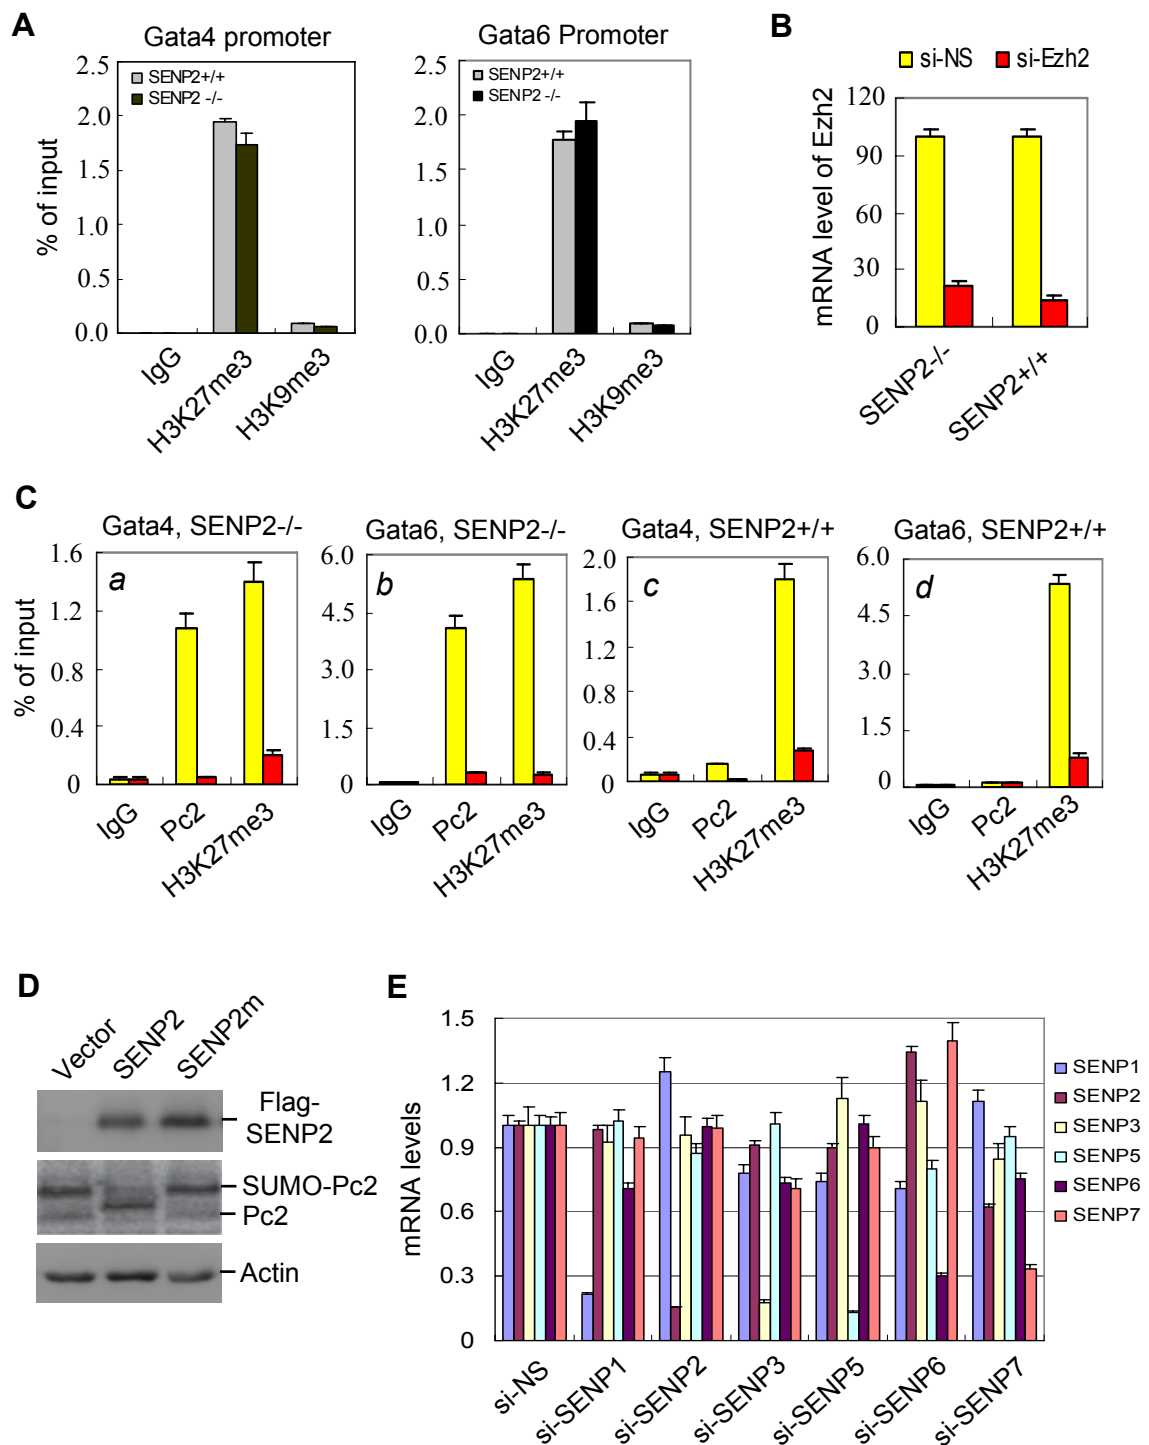

**Figure S3. SENP2 regulates Pc2 occupancy via H3K27me3.** **A.** H3K27me3 and H3K9me3 enrichment at the locus of *Gata4* and *Gata6* promoter were analyzed by a qChIP assay in SENP2<sup>+/+</sup> and <sup>-/-</sup> MEF cells. Data are shown in means±s.d. of three independent transfection experiments. **B.** Ezh2 mRNA was measured by real-time PCR in the SENP2<sup>-/-</sup> and SENP2<sup>+/+</sup> MEF cells transfected with siRNA against Ezh2 (si-Ezh2: shRNA sequence AGCTCAAGAGGTTTCAGAAG) or non-specific control (si-NS). **C.** Pc2 and H3K27me3 occupancy at the *Gata4* and *Gata6* promoter in SENP2<sup>-/-</sup> MEF cells

(*a* and *b*) and SENP2<sup>+/+</sup> MEF cells (*c* and *d*) were analyzed by a qChIP assay as indicated. Pc2 binding to the promoters of Gata4 and Gata6 was much higher in si-NS SENP2<sup>-/-</sup> MEF cells (*a* and *b*) than that in si-NS SENP2<sup>+/+</sup> MEF cells (*c* and *d*) presumably due to enhanced SUMOylation of Pc2 in SENP2<sup>-/-</sup> MEF cells (see Figure 5B). “Yellow” indicates si-NS and “red” indicates si-Ezh2 cells. Data are shown in means±s.d. of three independent transfection experiments. **D.** The expression level of SENP2, Pc2, and SUMO-Pc2 in SENP2<sup>-/-</sup> MEF cells transfected with pBabe-SENP2 or pBabe-SENP2 mutant. **E.** SENP transcripts were measured by using real-time PCR in 293 cells transfected with siRNA as indicated. The mRNA level is shown in means±s.d. of three independent transfection experiments.

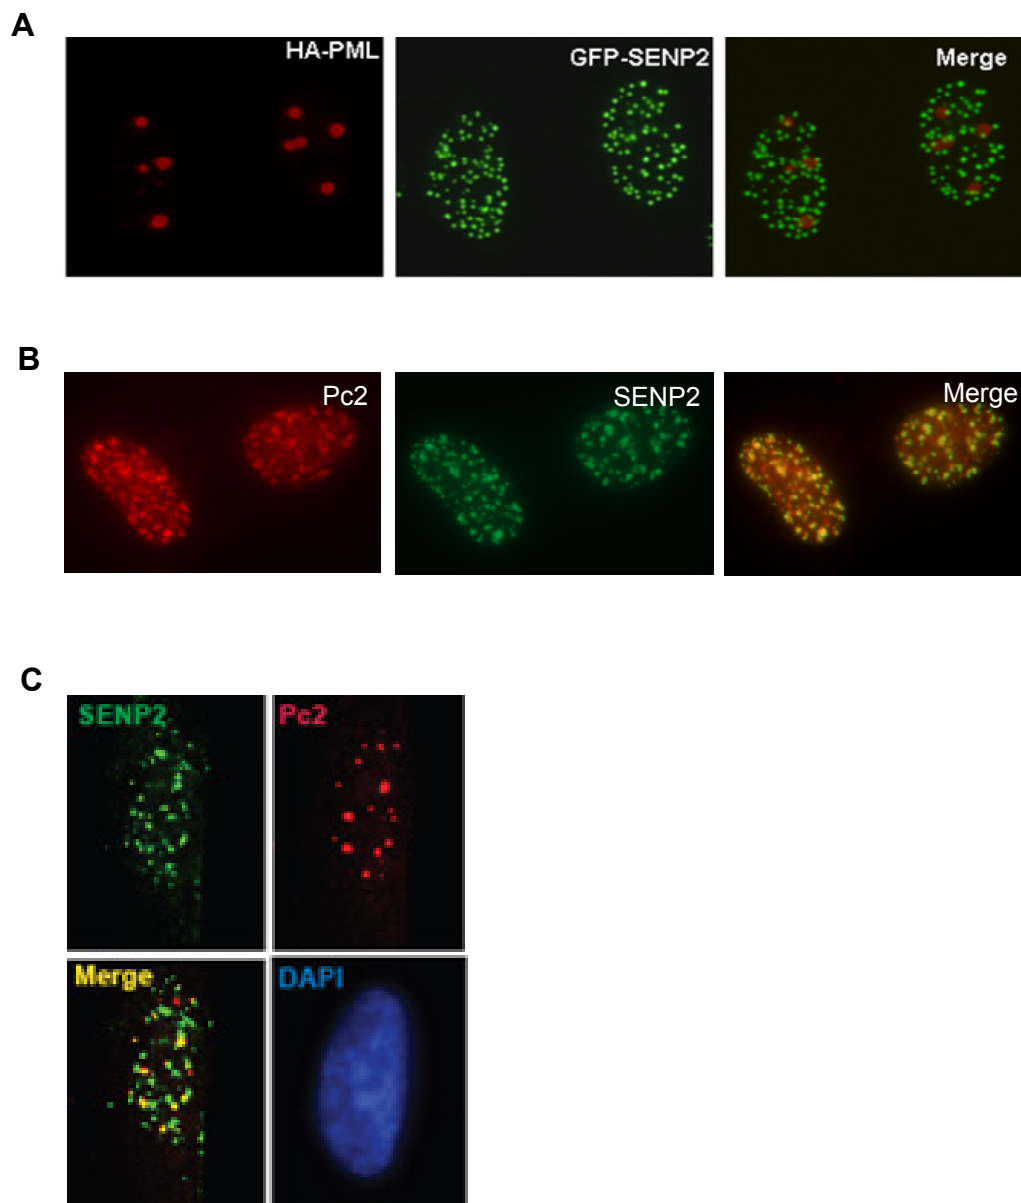

**Figure S4. Co-localization of SENP2 with Pc2 in the nucleus.** **A.** SENP2 and PML do not co-localize in the nucleus of COS-1 cells transfected with GFP-SENP2 and HA-PML. **B.** Co-localization of SENP2 with Pc2 in HeLa cells transfected with GFP-SENP2 and

Flag-Pc2. C. Co-localization of endogenous SENP2 with Pc2 in HUVEC cells.

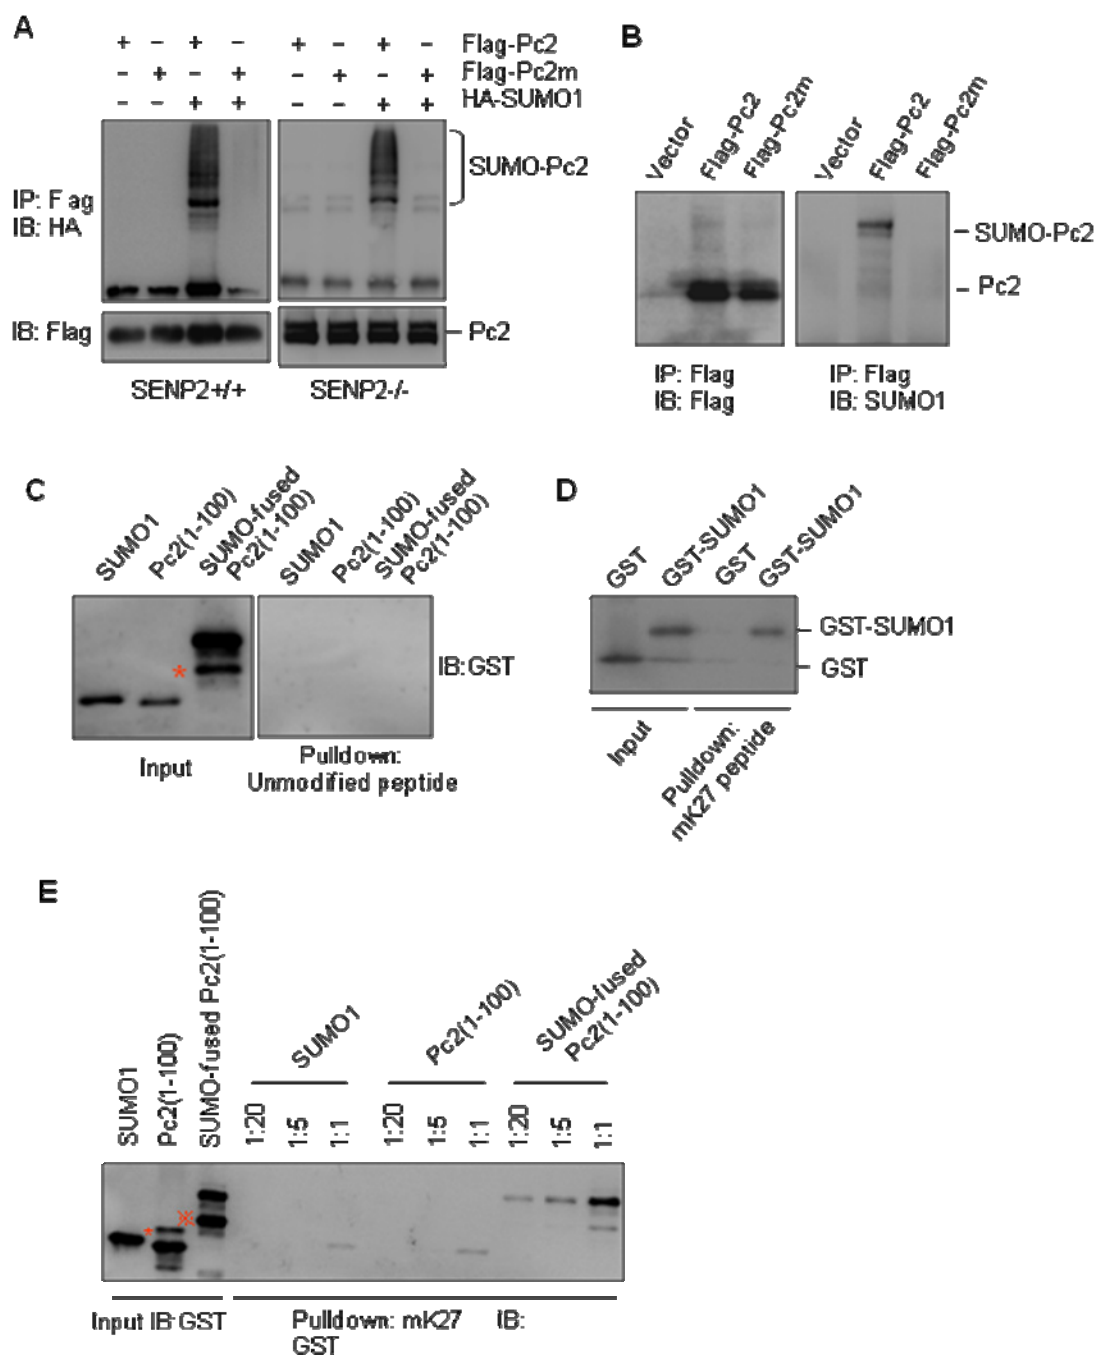

**Figure S5. SUMOylation specifically enhances binding of Pc2 to H3K27me3.**

**A.** The immunoprecipitates with anti-Flag (IP) from transfected SENP2<sup>+/+</sup> or <sup>-/-</sup> (control for **Figure 6A**) MEF cells as indicated were detected by immunoblotting with anti-HA and anti-Flag (IB). **B.** The immunoprecipitates with anti-Flag (IP) from transfected SENP2<sup>-/-</sup> MEF cells with Flag-Pc2 or Flag-Pc2 mutant were detected by immunoblotting with anti-Flag or anti-SUMO1 (IB). **C.** Biotinylated histone H3 unmodified peptides were incubated with GST-SUMO1, GST-Pc2(1-100), or GST-SUMO1-fused Pc2(1-100) recombinant proteins in the presence of streptavidin-conjugated sepharose beads. The inputs and precipitates were detected by immunoblotting (IB) with anti-GST. “\*” indicates

a degraded band. **D.** Biotinylated histone H3 peptides that were tri-methylated on K27 (mK27), were incubated with GST and GST-SUMO1 recombinant proteins in the presence of streptavidin-conjugated sepharose beads. Inputs and precipitates by mK27 peptides were detected with anti-GST. **E.** *In vitro* titration binding assay shows that SUMOylation facilitates binding of Pc2 chromodomain to tri-methylated H3K27. Biotinylated histone H3 peptides that were tri-methylated on K27 (mK27), were incubated with titrated amount of GST-SUMO1, GST-Pc2(1-100), or GST-SUMO1-fused Pc2(1-100) recombinant proteins in the presence of streptavidin-conjugated sepharose beads. The precipitates were detected by immunoblotting (IB) with anti-GST. “\*” indicates a non-specific band. “□” indicates a degraded band.

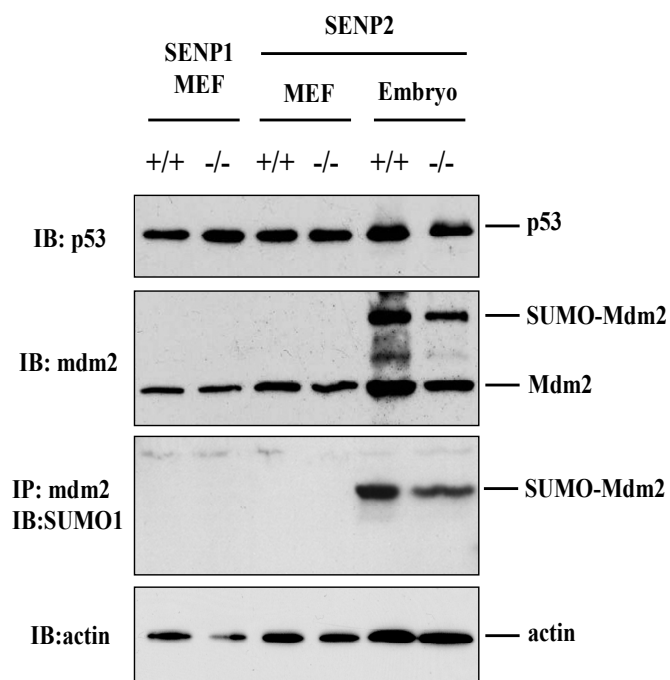

**Figure S6.** The p53 protein level and Mdm2 SUMOylation state were analyzed in SENP1 and SENP2 MEF cells (+/+ and -/-), and SENP2 embryos (+/+ and -/-).

**Table S1. Primers for real time PCR**

| Gene    | Forward primer            | Reverse primer            |
|---------|---------------------------|---------------------------|
| mSENP2  | AAGAAGTGTCTGCCCGACTT      | TGGCCCAGGGCATTACTGATTT    |
| mBmp6   | AGCAGAGTCGCAACCGGTC       | GGGTGCAATGATCCAGTCCT      |
| mGAPDH  | TTCACCACCATGGAGAAGGC      | CCCTTTTGGCTCCACCCT        |
| mGata4  | GTCGTAATGCCGAGGGTGA       | TCCTTCCGCATTGCAAGAG       |
| mGata6  | GACGGCACCGGTCATTACC       | ACAGTTGGCACAGGACAGTCC     |
| mHoxa1  | ATTCCCCTCGAGTTGTGGTCCAA   | AGGTTTCCAGAGTAAACAGCGGGA  |
| mHoxa4  | TATACCCGGCAGCAAGTCTTGAA   | GATCGCATCTTGGTGTGGGAAGT   |
| mHoxa7  | AGACGCTGGAAGTGGAGAAGGAAT  | TCTTCCACTTCATGCGCCGATTCT  |
| mHoxa11 | AGCGAGAGTTCTTCTTCAGCGTCT  | TTTGACTTGACGGTCGGTGAGGTT  |
| mHoxb2  | GCTGGAGAAGGAGTTCCACTTCAA  | GCTTGTGTTTCATGCGTCGGTTCT  |
| mHoxb4  | CCTGGATGCGCAAAGTTCA       | CGCGTCAGGTAGCGATTGTA      |
| mHoxb7  | CCCGAACAACTTCTTGCGCCTTT   | CAGTGCATGTTGAAGGAACTCGGT  |
| mHoxb13 | CATTCTGGAAAGCAGCGTTTG     | TGTTGGCTGCATACTCCCG       |
| mHoxc6  | TAACCCTTCCTTATCCTGCCACCT  | TGCTCCATAGGTCGAGAAATGCCT  |
| mHoxc10 | TGACAGCAAAGAGCGGAAGGAAGA  | AATGGTCTTGCTAATCTCCAGGCG  |
| mHoxc12 | TCTGGTTTTGCGCGTTGAAC      | AGATTCAAGCGGTCCGAGAGT     |
| mHoxd13 | AAAGGGTGCCTTACACCAAAGTGC  | ACAGTGTCTTTGGCTTGGAGACGA  |
| hSENP2  | AGCCTGGTGGTGATTGACCTAAGA  | AGCTGTTGAGGAATCTCGTGTGGT  |
| hHoxa2  | TGCAGCATCTGAATTAATAAAAACA | CCA AATAAAAAGAAGGCAAAACC  |
| hHoxa4  | CCACAAACTGCCAACACCAAGAT   | GTGTGGGCTCTGAGTTTGTGCTTT  |
| hHoxa7  | AGAAGGAGTTCCACTTCAACCGCT  | AGATCTTAATCTGGCGCTCGGTGA  |
| hHoxa11 | AACGGGAGTTCTTCTTCAGCGTCT  | ACTTGACGATCAGTGAGGTTGAGC  |
| hHoxb4  | AGGTCTTGGAGCTGGAGAAGGAAT  | GGTGTGGGCAACTTGTGGTCTTT   |
| hHoxb7  | AGACCTGGAGCTGGAGAAAGAAT   | ATGCGCCGGTCTGAAACCAAATC   |
| hHoxb13 | TACGCTGATGCCTGCTGTCAACTA  | AGTACCCGCCTCCAAAGTAACCAT  |
| hHoxc6  | AGGACCAGAAAGCCAGTATCCAGA  | ATTCCTTCTCAGTTCAGGGTCT    |
| hHoxc10 | TGAAATCAAGACGGAGCAGAGCCT  | TTGCTGTCAGCCAATTTCTGTGG   |
| hHoxc12 | AGGGAAGTCTCAGACCGCTTGAAT  | AGAGCTTGCTCCCTCAACAGAAGT  |
| hHoxd13 | ATGTGGCTCTAAATCAGCCGACACA | AGATAGGTTCTGATGAGCCGAGAT  |
| hGata4  | TCTCAGAAGGCAGAGAGTGTGTCA  | GGTTGATGCCGTTTCATCTTGTGGT |
| hGAPDH  | CATGTTTCGTCATGGGTGTGAACCA | AGTGATGGCATGGACTGTGGTCAT  |
